# Supplementary material
Source: Springer Nature journal article supplement (https://www.springermedizin.de/resource/supplementary/12913_2012_3136_MOESM1_ESM.pdf/9532410)
Supplement: MOESM1 [file 9532410]

## Additional file 1 – Literature Search Strategy

### Literature Search Strategy

Dates Conducted: October 2011 – February 2012

Limits: English language only, human studies, 2000 to date

Topic: Strategies within health organizations for capacity building for the use of evidence in program planning. For example, what's effective in promoting evidence use within organizations, use of evidence in context & for program evaluation. Not clinical evidence, policy or program planning evidence. Three concepts within this topic:

- KT within health care organizations
- organizational development
- program evaluation

| Concept 1                           | Concept 2                                              | Concept 3                  | Concept 4 NOT  |
|-------------------------------------|--------------------------------------------------------|----------------------------|----------------|
| MeSH terms                          | MeSH terms                                             | Title words                |                |
| Decision making[majr]               | Evidence-based medicine[mh]                            | Implement*[ti]             | Patient[ti]    |
| Decision making, organizational[mh] | Evidence-based practice[mh]                            | Integrat*[ti]              | Physician*[ti] |
| Policy making [mh]                  | Knowledge[majr]                                        | Barrier*[ti]               | Clinical[ti]   |
| Program development [mh]            | Information dissemination[mh]                          | Uptake[ti]                 | Nurs*[ti]      |
| Health policy [mh]                  | Communication barriers[mh]                             | Facilitat*[ti]             | Clinician*[ti] |
|                                     |                                                        | Capacity[ti]               | Surgical[ti]   |
| Program evaluation[mh]              | Interdisciplinary communication[mh]                    | “evidence use”[ti]         | Care[ti]       |
| Health plan implementation[mh]      | Persuasive communication[mh]                           | “research utilisation”[ti] | Community[ti]  |
| Delivery of health Care/methods     | Health services research/utilization                   | “research utilization”[ti] | Therap*[ti]    |
| Models, organizational[mh]          | Health services research/organization & administration | “research use”[ti]         | Midwife*[ti]   |
| Quality assurance, Health care[mh]  | Diffusion of innovation[majr]                          | “research evidence”[ti]    | Child*[ti]     |
| Organizational                      | Group                                                  | “evidence-based”[ti]       | Immigrant*[ti] |

|                                              |                                                                   |                                                           |                      |
|----------------------------------------------|-------------------------------------------------------------------|-----------------------------------------------------------|----------------------|
| policy[majr]                                 | processes[mh]                                                     |                                                           |                      |
| Systems integration[majr]                    | Translational research[mh]                                        | "evidence informed"[ti]                                   | Physical[ti]         |
|                                              | Organizational case studies[mh]                                   | Gap[ti]                                                   | Family[ti]           |
| Organization and administration/standards    | Organizational culture[mh]                                        | Influenc*[ti]                                             | Women*[ti]           |
|                                              |                                                                   | Partnership*[ti]                                          | Adolescent*[ti]      |
|                                              |                                                                   | Improv*[ti]                                               | Medicine[ti]         |
| Additional keywords                          | Additional keywords                                               |                                                           | Health promotion[mh] |
| "program plan"[ti]                           | evidence[TI]                                                      | "knowledge"[ti]                                           | Emergenc*[ti]        |
| "programme plan"[ti]                         | "evidence-based management"[tiab]<br>OR "evidence-informed"[tiab] | "knowledge management"[ti]                                | Population[ti]       |
| Policy[ti] OR policies[ti] OR policymak*[ti] | "learning organization"[tiab]<br>OR "learning organisation"[tiab] | "knowledge utilization"[ti] OR "knowledge utilisation[ti] |                      |
| "decision mak"[ti] OR decisionmak*[ti]       | Manag*[ti]                                                        | "knowledge use"[ti]                                       |                      |
|                                              |                                                                   | "knowledge translation"[ti]                               |                      |
|                                              | Research Support as Topic[mh]                                     | "knowledge broker"[ti]                                    |                      |
|                                              | Health knowledge, attitudes, practice[mh]                         | Informed[ti]                                              |                      |
|                                              | "research to practice"[ti]                                        | Culture[ti]                                               |                      |
|                                              | "best practice"[ti]                                               | "evidence utilisation"[ti]                                |                      |
|                                              |                                                                   | "utilisation of evidence"[ti]                             |                      |
|                                              |                                                                   | "utilization of evidence"[ti]                             |                      |

### Final search strategy

1. PubMed (www.pubmed.gov, searched 20 Oct 2011) =9783 references

\* search term Policy making[mh] added 21 Oct 2011 = 391 additional references

|                                                                                                                                                                                                                    |         |
|--------------------------------------------------------------------------------------------------------------------------------------------------------------------------------------------------------------------|---------|
| #47 Search #45 OR #46                                                                                                                                                                                              | 9783    |
| #46 Search #44 Limits: Humans, English, Publication Date from 2000                                                                                                                                                 | 9647    |
| #45 Search #44 AND (publisher[sb] OR in process[sb] OR pubmednotmedline[sb]) Limits: Publication Date from 2000                                                                                                    | 136     |
| #44 Search #35 NOT #43 Limits: Publication Date from 2000                                                                                                                                                          | 11892   |
| #43 Search #38 OR #40 OR #41 OR #42 Limits: Publication Date from 2000                                                                                                                                             | 1506058 |
| #42 Search surgical[ti] OR community[ti] OR therap*[ti] OR midwif*[ti] Limits: Publication Date from 2000                                                                                                          | 294867  |
| #41 Search immigrant*[ti] OR migrant*[ti] OR physical[ti] OR family[ti] OR women*[ti] OR medicine[ti] OR medical[ti] OR health promotion[mh] OR emergenc*[ti] OR population[ti] Limits: Publication Date from 2000 | 375649  |
| #40 Search child[ti] OR childhood[ti] OR children[ti] OR adolescent*[ti] OR adolescence[ti] Limits: Publication Date from 2000                                                                                     | 212574  |
| #38 Search patient*[ti] OR physician*[ti] OR clinical[ti] OR nurs*[ti] OR clinician*[ti] Limits: Publication Date from 2000                                                                                        | 763903  |
| #37 Search #36 Limits: Publication Date from 2000                                                                                                                                                                  | 28767   |
| #36 Search #17 AND (#33 OR #34)                                                                                                                                                                                    | 37122   |
| #35 Search #17 AND #34                                                                                                                                                                                             | 23895   |

#34 Search #18 OR #19 OR #20 OR #21 OR #22 OR #23 OR 249445  
#24 OR #25 OR #26 OR #27 OR #28 OR #29 OR #30 OR

|                                                                                                                |        |
|----------------------------------------------------------------------------------------------------------------|--------|
| #31 OR #32                                                                                                     |        |
| #32 Search "learning organization"[tiab] OR "learning organisation"[tiab]                                      | 139    |
| #31 Search "evidence-informed"[tiab]                                                                           | 305    |
| #30 Search "evidence-based management"[tiab]                                                                   | 516    |
| #29 Search evidence[ti]                                                                                        | 146188 |
| #28 Search translational research[mh]                                                                          | 1318   |
| #27 Search diffusion of innovation[mh]                                                                         | 12903  |
| #26 Search health services research/organization & administration                                              | 8748   |
| #25 Search health services research/utilization                                                                | 209    |
| #24 Search persuasive communication[mh]                                                                        | 2501   |
| #23 Search interdisciplinary communication[mh]                                                                 | 6785   |
| #22 Search communication barriers[mh]                                                                          | 3988   |
| #21 Search information dissemination[mh]                                                                       | 7376   |
| #20 Search knowledge[mh] OR knowledge[ti]                                                                      | 35410  |
| #19 Search evidence-based practice[mh]                                                                         | 46870  |
| #18 Search evidence-based medicine[mh]                                                                         | 43280  |
| #17 Search #1 OR #2 OR #3 OR #4 OR #5 OR #6 OR #7 OR #8 OR #9 OR #10 OR #11 OR #12 OR #13 OR #14 OR #15 OR #16 | 355173 |

|                                                                               |        |
|-------------------------------------------------------------------------------|--------|
| #16 Search "decision making"[ti] OR "decision maker*"[ti] OR decisionmak*[ti] | 11913  |
| #15 Search policy[ti] OR policymak*[ti]                                       | 25016  |
| #14 Search organization and administration/standards                          | 53010  |
| #13 Search organizational culture[mh]                                         | 10759  |
| #12 Search organizational case studies[mh]                                    | 7958   |
| #11 Search systems integration[majr]                                          | 2205   |
| #10 Search organizational policy[majr]                                        | 3030   |
| #9 Search quality assurance, health care[majr]                                | 100604 |
| #8 Search models, organizational[mh]                                          | 12729  |
| #7 Search delivery of health care/methods                                     | 9179   |
| #6 Search health plan implementation[mh]                                      | 2831   |
| #5 Search program evaluation[mh]                                              | 46786  |
| #4 Search health policy[mh]                                                   | 69711  |
| #3 Search program development[mh]                                             | 18929  |
| #2 Search decision making, organizational[mh]                                 | 9953   |
| #1 Search decision making[majr]                                               | 41845  |

## 2. The Cochrane Library (John Wiley, issue of 12 2011)

Cochrane Reviews [35] | Other Reviews [3] | Clinical Trials [339] | Methods Studies [191] | Technology Assessments [3] | Economic Evaluations [0] | Cochrane Groups [0]

|    |                                                                                                                                                     |       |
|----|-----------------------------------------------------------------------------------------------------------------------------------------------------|-------|
| #1 | (decision making):ti,ab,kw or (decision*):ti                                                                                                        | 4471  |
|    | (inform OR informed):ti,ab,kw or "evidence based practice":ti,ab,kw or "evidence based management":ti,ab,kw or (research):ti,ab,kw                  | 44386 |
| #3 | "learning organization":ti,ab,kw or (information dissemination):ti,ab,kw or (knowledge):ti,ab,kw or (communication):ti,ab,kw or (barriers):ti,ab,kw | 17260 |
| #4 | (uptake):ti,ab,kw or (diffusion):ti,ab,kw or (integrat*):ti,ab,kw or (implement*):ti,ab,kw or (capacity):ti,ab,kw                                   | 32478 |
| #5 | (#1 AND #2 AND ( #3 OR #4 ))                                                                                                                        | 571   |

### 3. Centre for Reviews and Dissemination (CRD) databases (DARE, HTA, NHS EED)

(<http://www.crd.york.ac.uk/crdweb/>; searched 3 Nov 2011)

|   |                                                                                        |     |
|---|----------------------------------------------------------------------------------------|-----|
| 1 | MeSH DESCRIPTOR Decision Making, Organizational EXPLODE ALL TREES                      | 15  |
| 2 | MeSH DESCRIPTOR Decision Making EXPLODE ALL TREES                                      | 223 |
| 3 | "capacity building"                                                                    | 8   |
| 4 | ("learning organization")                                                              | 1   |
| 5 | MeSH DESCRIPTOR Information Dissemination EXPLODE ALL TREES                            | 19  |
| 6 | (knowledge):TI OR (communication):TI OR (barriers):TI OR (uptake):TI OR (integrat*):TI | 322 |

|    |                                                                          |       |
|----|--------------------------------------------------------------------------|-------|
| 7  | #1 OR #2                                                                 | 238   |
| 8  | #5 OR #6                                                                 | 339   |
| 9  | #7 AND #8                                                                | 5     |
| 10 | #3 OR #4 OR #9                                                           | 14    |
| 11 | ("evidence informed") OR ("research evidence") OR ("knowledge transfer") | 215   |
| 12 | #10 OR #11                                                               | 228   |
| 13 | * FROM 2000 TO 2011                                                      | 38837 |
| 14 | #12 AND #13                                                              | 171   |

#### 4. EMBASE (Ovid, 1980 to 2011 Week 43)

|   |                                      |        |
|---|--------------------------------------|--------|
| 1 | exp decision making/                 | 110862 |
| 2 | policy making.mp. or exp management/ | 552172 |
| 3 | learning organization.mp.            | 128    |
| 4 | 1 or 2                               | 651705 |
| 5 | exp information dissemination/       | 9961   |
| 6 | exp knowledge management/            | 418    |
| 7 | barrier*.ti.                         | 29033  |



|    |                                                                                                                                    |         |
|----|------------------------------------------------------------------------------------------------------------------------------------|---------|
| 8  | uptake.ti.                                                                                                                         | 53613   |
| 9  | evidence informed.mp.                                                                                                              | 327     |
| 10 | research evidence.mp.                                                                                                              | 2888    |
| 11 | evidence based management.mp.                                                                                                      | 617     |
| 12 | knowledge transfer.mp.                                                                                                             | 648     |
| 13 | 5 or 6 or 7 or 8 or 9 or 10 or 11 or 12                                                                                            | 96954   |
| 14 | 4 and 13                                                                                                                           | 3848    |
| 15 | 3 or 14                                                                                                                            | 3974    |
| 16 | limit 15 to (english language and yr="2000 -Current")                                                                              | 3290    |
| 17 | (child or childhood or children or adolescent* or adolescence).ti.                                                                 | 598693  |
| 18 | (immigrant* or migrant* or physical or family or women* or medicine or medical or health promotion or emergenc* or population).ti. | 885129  |
| 19 | (surgical or community or therap* or midwif*).ti.                                                                                  | 851196  |
| 20 | (patient* or physician* or clinical or nurs* or clinician*).ti.                                                                    | 2060046 |
| 21 | 17 or 18 or 19 or 20                                                                                                               | 4049085 |
| 22 | 16 not 21                                                                                                                          | 2181    |
| 23 | limit 22 to (human and english language and yr="2000 - Current")                                                                   | 1511    |

5. ProQuest Dissertations & Theses (searched 4 Nov 2011)

128 documents found for: ("decision making" OR decisionmaker\* OR "evidence informed" OR "evidence based manage\*" OR "evidence based practice" OR "learning organization" OR "learning organisation") AND ("knowledge trans\*" OR "research use" OR "research utilization" OR "research utilisation" OR "research uptake" OR "evidence uptake") AND PDN(>1/1/2000) AND PDN(<12/31/2011)

6. Web of Science (Thomson Reuters; Science Citation Index Expanded (SCI-EXPANDED); Social Sciences Citation Index (SSCI); Arts & Humanities Citation Index (A&HCI); Conference Proceedings Citation Index- Science (CPCI-S); Conference Proceedings Citation Index- Social Science & Humanities (CPCI-SSH); Book Citation Index– Science (BKCI-S); Book Citation Index– Social Sciences & Humanities (BKCI-SSH); searched 4 Nov 2011)

# 4 521 (#3) AND Language=(English)

Databases=SCI-EXPANDED, SSCI, A&HCI, CPCI-S, CPCI-SSH, BKCI-S, BKCI-SSH Timespan=2000-2011

Lemmatization=On

# 3 551 #2 AND #1

Databases=SCI-EXPANDED, SSCI, A&HCI, CPCI-S, CPCI-SSH, BKCI-S, BKCI-SSH Timespan=All Years

Lemmatization=On

# 2 5,537 Topic=("knowledge trans\*") OR Topic=("research use") OR Topic=("research utilization") OR Topic=("research utilisation") OR Topic=("research uptake") OR Topic=("evidence uptake")

Databases=SCI-EXPANDED, SSCI, A&HCI, CPCI-S, CPCI-SSH, BKCI-S, BKCI-SSH Timespan=All Years

Lemmatization=On

# 1 153,278 Topic=("decision making" OR decisionmaker\* OR "decision maker\*" OR decisionmaking) OR Topic=("evidence informed" OR "evidence based manage\*" OR "evidence based practice") OR Topic=("learning organization" OR "learning organisation")

Databases=SCI-EXPANDED, SSCI, A&HCI, CPCI-S, CPCI-SSH, BKCI-S, BKCI-SSH Timespan=All Years

Lemmatization=On

7. CINAHL (Nursing & Allied Health) (EBSCOHost; searched 8 Dec 2011)

|    |                                                                                                                                                                  |        |
|----|------------------------------------------------------------------------------------------------------------------------------------------------------------------|--------|
| S5 | S1 and S2 and S3<br>Limiters - English Language; Published Date from: 20000101-20111231; Exclude MEDLINE records<br>Search modes - Find all my search terms      | 513    |
| S4 | S1 and S2 and S3                                                                                                                                                 | 1875   |
| S3 | TI implement* OR TI integrat* OR TI barrier* OR TI uptake OR TI facilitat* OR TI utiliz* OR TI research use OR TI using OR TI partner* OR TI gap* OR TI informed | 106677 |
| S2 | evidence OR knowledge OR information dissemination OR learning organization                                                                                      | 210511 |
| S1 | decision making OR policy making OR program development OR organizational policy OR (organization and administration )                                           | 98552  |

8. ABI Inform (ProQuest; searched 13 Dec 2011)

33 documents found for: (evidence-based practice) AND (decision making OR organizational behavior) AND PDN(>1/1/2000) AND PDN(<12/31/2011)

9. Library and Information Science Abstracts (LISA; searched 13 Dec 2011)

Search Query #4 TI=(evidence\* or knowledge or information) and TI=(decision\* or organization\* or practice\*) and health\* 123 Published Works results found in LISA: Library and Information Science Abstracts (limit 2000-2012)

Additional sources (searched 8 Dec 2011 – 28 Feb 2012)

- The Campbell Collaboration Library of Systematic Reviews <http://www.campbellcollaboration.org/library.php> – scanned list of titles of all reviews = 0 relevant references
- KU-UC database <http://kuuc.chair.ulaval.ca/english/index.php> - scanned titles in category for Evidence-based decision making OR knowledge utilization = 469 references; 7 relevant non-duplicate references added to database
- KT+ database <http://plus.mcmaster.ca/kt/Default.aspx> - searched keywords “decision\*” and “evidence”; scanned results, references too clinical; nothing relevant identified:

| Search Results                                          |                  |
|---------------------------------------------------------|------------------|
| Quality-Filtered Articles*:                             | View 50 matches  |
| Original Studies Included in Quality Filtered Reviews†: | View 152 matches |
| Quality Improvement Studies from Pubmed‡:               | View 100 matches |

- NYAM Grey literature collection <http://www.nyam.org/library/online-resources/grey-literature-report/> - searched “decision making” = 150 hits, 4 possibly relevant; “decision” AND “evidence” = 59 hits, 1 possibly relevant
- MEDLINE Author Search
 

|                        |     |
|------------------------|-----|
| 16 “Lavis JN” [Author] | 98  |
| 15 lavis j             | 124 |

|                          |     |
|--------------------------|-----|
| 14 "Lomas J" [Author]    | 124 |
| 13 Lomas J               | 167 |
| 12 "Oxman AD" [Author]   | 193 |
| 11 oxman ad              | 193 |
| 10 "Kovner AR" [Author]  | 42  |
| 9 Kovner ar              | 42  |
| 8 "Rundall TG" [Author]  | 56  |
| 7 rundall tg             | 56  |
| 6 "Grimshaw JM" [Author] | 132 |
| 5 grimshaw jm            | 378 |
| 4 "Dobbins M" [Author]   | 40  |
| 3 dobbins m              | 75  |
| 2 "Ham C" [Author]       | 181 |
| 1 ham c                  | 202 |
